# Supplementary material
Source: PubMed Central journal article supplement (PMC4284554)
Supplement: pnas.201411072SI.pdf [file pnas.201411072SI.pdf]

# Supporting Information

Holmes et al. 10.1073/pnas.1411072112

## SI Materials and Methods

**Antibodies Used in This Study.** We used the following antibodies (with supplier and clone information):

From BD Biosciences: NKp30 (p30-15), NKp44 (p44-8.1), NKp46 (9E2/NKp46), NKG2D (1D11), 2B4 (2B4), DNAM-1 (DX11), CD16 (3G8), CD107a (H4A3), CD107b (H4B4), HLA-DR (TU36), CD86 (GL1), CD40 (5C3), CD69 (FN50), CD62L (DREG-56), TNFSF9 (C65-485), CD54 (HA58), and TNF (MAbD11)

From Miltenyi Biotec: CD56 (REA196) and CD3 (BW264/56)

From Beckman Coulter: CD160 (BY55), KIR2DL1 (EB6), KIR2DL2/3 (GL183), and NKG2A (Z199)

From Biolegend: KIR3DL1 (DX9)

From R&D Systems: TNFSF14 (115520) and KIR2DL3 (180701). For neutralization studies, we used goat polyclonal antibodies against TNFSF14 and TNF from this manufacturer.

From AbD Serotec: CD11c (BU15)

**Cell Isolation and Culture.** Peripheral blood mononuclear cells (PBMCs) were isolated from healthy donor blood samples using Lymphoprep (Stemcell Technologies). Monocytes were isolated from PBMCs using anti-CD14 microbeads (Miltenyi Biotec) and iDCs prepared by culturing monocytes for 5 d with 800 U/mL GM-CSF and 400 U/mL IL-4 (R&D Systems) in RPMI media with 10% (vol/vol) FCS. NK cells were prepared from PBMCs using a negative isolation kit (Miltenyi Biotec). For experiments using NK and iDC coculture, monocytes and iDCs were prepared and a second blood sample was then used to prepare the NK cells on day 5 of the iDC culture. NK cells were cultured in DMEM media with 10% (vol/vol) FCS and 5% (vol/vol) human antibody serum. The tumor target cell lines (human erythroleukemic K562 cells and the mouse mast cell line P815) were cultured in RPMI with 10% (vol/vol) FCS. Cytokine stimulations used 50 U/mL IFN- $\gamma$ , 20 ng/mL IL-12 and 20 ng/mL IL-18, 300 U/mL IL-2, 30 ng/mL IL-15, or 50 ng/mL PMA plus 500 ng/mL ionomycin (PMA/I; Miltenyi Biotec). Human umbilical vein endothelial cells (HUVECs) from single donors were purchased from Promocell and cultured in endothelial cell basal medium (ECBM) with the manufacturer-supplied supplements (also from Promocell).

**Gene Expression Profiling and Validation.** Target K562 cells were coincubated with freshly isolated NK cells at a 1:1 ratio in round-bottomed FACS tubes in batches of 3 million cells per tube. Cells were centrifuged at  $20 \times g$  for 2 min and incubated at 37 °C for 4 h in the presence of 1:1,000 GolgiStop inhibitor (BD Biosciences) and CD107 antibodies. Cells were subsequently stained for NK-cell markers and sorted on a MoFlo cell sorter (Beckman Coulter). CD56<sup>dim</sup> NK cells were sorted on the basis of cell surface CD107 expression into CD107<sup>+</sup> (R-NK) and CD107<sup>neg</sup> (NR-NK) fractions and collected in cold RPMI media with cell purity exceeding 97%. Cells were centrifuged and resuspended in TRIzol reagent (Life Technologies) and snap-frozen. Samples were thawed and further processed as a pooled sample (combining three individual donors from six experiments) and a single-donor sample (from three experiments), with each sample containing approximately 1 million cells. Sample amplification was performed using the Illumina TotalPrep RNA amplification

kit (from Life Technologies), according to the manufacturer's instructions. For hybridization, 750 ng of biotin-labeled cRNA was randomly loaded onto an Illumina Sentrix BeadChip Array (HumanRef-8\_V3 Beadchips) for expression analysis. After 16 h of hybridization, the Beadchips were washed, Cy3-labeled, and scanned on an Illumina BeadArray reader, and the data were uploaded onto GenomeStudio (Illumina) for background subtraction and conversion into a Partek file for data analysis on Partek Genomics Suite. The data were subjected to log<sub>2</sub> transformation, quantile normalization, and batch effect removal. Principal component analysis was performed to check the clustering of the samples. An ANOVA model was used for determining the differentially expressed mRNAs (R-NK vs. NR-NK) within the single-donor and pooled samples. A 1.5-fold change cutoff (representing size of the change) and a *P* value with a false discovery rate (Benjamini and Hochberg) cutoff of <0.05 (representing the significance of the change) were used to obtain the differentially expressed genes. The array data have been deposited in the Gene Expression Omnibus ([ncbi.nlm.nih.gov/geo](http://ncbi.nlm.nih.gov/geo)), under the accession number GSE55977.

For validation, NK cells were sorted on a Beckman Coulter MoFlo cell sorter on the basis of CD107 expression after K562 stimulation, as detailed above. RNA extraction was performed with an on-column DNase I digestion step (Sigma–Aldrich). First-strand DNA synthesis was carried out using SuperScript II (Life Technologies), and expression was analyzed using predesigned Taqman Expression Assays (Life Technologies). Samples were normalized to 18S RNA gene expression and compared using the  $\Delta\Delta CT$  method.

**Analytical Degranulation Assays Against K562 and P815 Cells.** NK cells were incubated with target cells at a 1:1 ratio for 6 h in the presence of anti-CD107a antibody and GolgiStop. NK cells were then stained for CD56, CD3, and TNFSF14 and analyzed on an LSRII flow cytometer (BD Biosciences). P815 cells were used as target cells in reverse antibody-dependent cellular cytotoxicity experiments by loading with combinations of receptor-activating antibodies (or IgG control) at 7  $\mu$ g/mL for 20 min at room temperature and then washed once before combining with NK cells.

**KIR Ligand Typing.** DNA was isolated from PBMCs and purified using column-based isolation (Sigma–Aldrich). KIR ligand typing was performed using an Olerup SSP KIR HLA typing PCR kit following the manufacturer's instructions. For some donors, the KIR haplotype was established using an Olerup SSP KIR typing kit.

**ELISA.** Supernatants were collected from NK cells cultured at 2.5 million cells per milliliter and stimulated with either 300 U/mL IL-2, 30 ng/mL IL-15, or 50 ng per 500 ng/mL PMA/I (or in media alone) for 24 h. Supernatants were diluted and assayed using either a TNFSF14 ELISA (R&D Systems) or TNF sandwich ELISA (Peprotech).

For the analysis of TNFSF14 and TNF production by IL-2- and IL-15-treated licensed and unlicensed populations, NK cells were isolated from donors typed for the expression of KIR ligands (Fig. S3). The licensed and unlicensed NK cells were cell-sorted (using FACS) as CD56<sup>dim</sup>CD3<sup>neg</sup> cells that were either self-KIR<sup>+</sup>, NKG2A<sup>+/-</sup> (licensed cells), or self-KIR<sup>neg</sup>NKG2A<sup>neg</sup> (unlicensed cells). These sorted populations were cultured at a density of 1 million cells per milliliter in media alone or in media supplemented with 300 U of IL-2 or 30 ng/mL IL-15 for 24 h. These populations were analyzed by flow cytometry and ELISA.

**NK and DC Coculture.** Sorted NK cells were cocultured with iDCs at a 1:1 ratio for 48 h with either media alone, 12  $\mu\text{g}/\text{mL}$  neutralizing anti-TNFSF14 antibody (goat polyclonal; R&D Systems), anti-TNF (goat polyclonal; R&D Systems), or normal goat IgG. Cytokine-activated NK cells (300 U/mL IL-2 or 30 ng/mL IL-15) were cocultured at an NK/DC ratio of 1:3 for 15 h. DC maturation was identified by expression of CD86 gating on CD11c<sup>+</sup> DCs.

**HUVEC Stimulation.** HUVECs were cultured according to the supplier's instructions (Promocell). HUVECs were used until passage 6, and cultured in endothelial cell basal medium

(ECBM) (ECBM with the manufacturer's supplements). For stimulation, cells were washed, trypsinized (endothelial cell detachment kit; Promocell), and plated into six-well plates at a density of  $2 \times 10^5$  cells per well. Cells were then incubated for 24 h at 37 °C. Before stimulation, cells were transferred to low-serum media [ECBM with 2% (vol/vol) FCS and no further growth factors] for 2 h. NK cell-conditioned medium was then added to the ECBM/2% (vol/vol) FCS at a 1:1 ratio. Cells were cultured for a further 12 h before being analyzed for cell surface ICAM-1 (CD54) expression by flow cytometry.

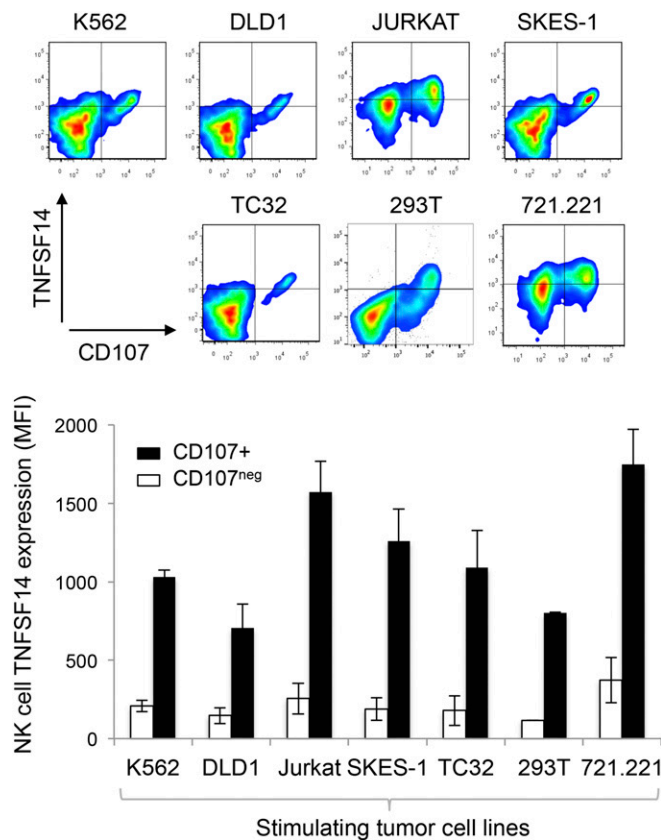

**Fig. S1.** Multiple human tumor cell lines induce the expression of TNFSF14 on responding (CD107<sup>+</sup>) NK cells. The target cell lines used are derived from hematopoietic tumors (K562, erythroleukemic cells from chronic myeloid leukemia; Jurkat, T-cell leukemia; 721.221, EBV-transformed B lymphoblastoid cells) and from solid tumors (DLD-1, colorectal; TC32 and SKES-1, Ewing's sarcoma). The 293T cells do not originate from a tumor but are embryonic kidney cells transformed in vitro with adenovirus DNA. In addition, they express SV40 T antigen. (Top) Primary human NK cells (isolated from healthy donors) were cocultured for 4 h with the indicated tumor cells (at an effector/target ratio of 1:1). Cell surface CD107 display (a marker of degranulation) and TNFSF14 expression were analyzed by flow cytometry, gating on the CD56<sup>+</sup>CD3<sup>neg</sup> NK-cell population. (Bottom) Summary of the TNFSF14 expression [using median fluorescence intensity (MFI)] on the responding (R-NK; CD107<sup>+</sup>) and nonresponding (NR-NK; CD107<sup>neg</sup>) NK-cell populations. These data were collected using NK cells from three healthy donors, showing SD from the mean.





**Table S1. Genes up-regulated (>1.5 fold;  $P < 0.05$ ) in R-NK cells compared with NR-NK cells and listed in Fig. 1**

| Gene            | Also known as  | Gene identification no. | Function                                                          |
|-----------------|----------------|-------------------------|-------------------------------------------------------------------|
| <i>KIR2DL1</i>  |                | 3802                    | Inhibitory receptor for HLA-C2 group (1)                          |
| <i>KIR2DL3</i>  |                | 3804                    | Inhibitory receptor for HLA-C1 group (1)                          |
| <i>KIR2DL4</i>  |                | 3805                    | Activating receptor for HLA-G (2)                                 |
| <i>KIR2DL5A</i> |                | 57292                   | Inhibitory receptor, unidentified ligand (1)                      |
| <i>KIR3DL1</i>  |                | 3811                    | Inhibitory receptor for HLA-Bw4 group (1)                         |
| <i>KIR3DL2</i>  |                | 3812                    | Inhibitory receptor for HLA-A3/A11 (1)                            |
| <i>KIR3DL3</i>  |                | 115653                  | Inhibitory receptor, unidentified ligand (1)                      |
| <i>KIR2DS1</i>  |                | 3806                    | Activating receptor for HLA-C2 group (1)                          |
| <i>KIR2DS5</i>  |                | 3810                    | Activating receptor, unidentified ligand (1)                      |
| <i>KLRC1</i>    | NKG2A          | 3821                    | Component of inhibitory receptor for HLA-E (3)                    |
| <i>KLRC2</i>    | NKG2C          | 3822                    | Component of activating receptor for HLA-E (3)                    |
| <i>CD226</i>    | DNAM-1         | 10666                   | Activating receptor for PVR and Nectin-2 (4)                      |
| <i>CRTAM</i>    | CRTAM          | 56253                   | Activating receptor for NECL2 (5)                                 |
| <i>VSTM3</i>    | TIGIT          | 201633                  | Inhibitory receptor for PVR and Nectin-2 (6)                      |
| <i>SLAMF7</i>   | CRACC          | 57823                   | EAT2-coupled activating receptor (7)                              |
| <i>HAVCR2</i>   | TIM3           | 84868                   | Regulatory receptor (8, 9)                                        |
| <i>CD69</i>     |                | 969                     | Activation marker; inhibits B-cell and T-cell egress from LN (10) |
| <i>CD160</i>    |                | 11126                   | HVEM axis (11)                                                    |
| <i>ICOS</i>     |                | 29851                   | CD28 family costimulatory (12)                                    |
| <i>PTPRC</i>    | CD45           | 5788                    | Tyrosine phosphatase. required for NK activity (13)               |
| <i>SELL</i>     | L-selectin     | 6402                    | Adhesion/homing (e.g., to lymph node) receptor (14)               |
| <i>IL-12RB2</i> |                | 3595                    | Component of the IL-12 receptor (15)                              |
| <i>IL-21R</i>   |                | 50615                   | Component of the IL-21 receptor (16)                              |
| <i>IL-4R</i>    |                | 3566                    | Component of the IL-4 receptor (17)                               |
| <i>TNFRSF1B</i> | TNFR1          | 16992                   | Component of TNF- $\alpha$ receptor (18)                          |
| <i>TNFRSF4</i>  | OX40           | 7293                    | Immune regulator (19)                                             |
| <i>TNFRSF9</i>  | 4-1BB/CD137    | 3604                    | Modulates NK-cell activity (20–22)                                |
| <i>TNFRSF7</i>  | CD27           | 939                     | NK-cell developmental marker (23)                                 |
| <i>SPRY1</i>    |                | 10252                   | Counteracts RTK signaling, inhibits T cells (24)                  |
| <i>SPRY2</i>    |                | 10253                   | Counteracts RTK signaling, inhibits T cells (25)                  |
| <i>MAP3K8</i>   | COT/TL2        | 1326                    | Regulates TNF- $\alpha$ expression (26)                           |
| <i>MAP2K3</i>   | MKK3           | 5606                    | Mitogen activated kinase, upstream of p38MAPK (27)                |
| <i>PTPN22</i>   |                | 26191                   | Tyrosine phosphatase, regulates activation (28)                   |
| <i>CBLB</i>     |                | 868                     | E3 ligase, regulates activation thresholds (29)                   |
| <i>PIK3C2B</i>  |                | 5287                    | Class II PI3K, T-cell activation (30)                             |
| <i>PIK3CA</i>   | p110 $\alpha$  | 5290                    | Class IA PI3K, multiple signaling events (31)                     |
| <i>PIK3R1</i>   | p85 $\alpha$   | 5295                    | Class IA PI3K, immune development (32)                            |
| <i>TRAF5</i>    |                | 7188                    | TNFRSF signal transduction (33)                                   |
| <i>LAX1</i>     |                | 54900                   | Negative regulator of T-cell activation (34)                      |
| <i>CDC42</i>    |                | 998                     | GTPase, cytoskeletal reorganization and NK cytotoxicity (35)      |
| <i>SH2D1B</i>   | EAT2           | 117157                  | SLAM family signal transduction in NK cells (36)                  |
| <i>SH2B1</i>    |                | 25970                   | Inhibitor of growth factor receptor signal transduction (37)      |
| <i>NFIL3</i>    | E4BP4          | 18030                   | TF, essential for NK development (38)                             |
| <i>NFATC1</i>   |                | 18018                   | TF, calcineurin-dependent inducible gene expression (39)          |
| <i>NFAT5</i>    |                | 10725                   | TF, calcineurin-independent gene expression (40)                  |
| <i>REL</i>      | c-REL          | 5966                    | TF, NF- $\kappa$ B component, inducible gene expression (41)      |
| <i>MYC</i>      | c-Myc          | 4609                    | TF, amplifier of gene expression (42)                             |
| <i>EGR1</i>     |                | 1958                    | TF, early growth response 1, immune modulation (43)               |
| <i>EGR2</i>     |                | 1959                    | TF, early growth response 2, immune modulation (43)               |
| <i>EGR3</i>     |                | 1960                    | TF, early growth response 3, immune modulation (43)               |
| <i>PRDM1</i>    | BLIMP1         | 639                     | TF, NK-cell maturation (44)                                       |
| <i>XBP1</i>     |                | 7494                    | TF, ER stress response, T-cell differentiation (45)               |
| <i>CSF2</i>     | GM-CSF         | 1437                    | Cytokine, regulates myeloid cells (46, 47)                        |
| <i>IL-3</i>     |                | 3562                    | Cytokine, regulates hematopoiesis (47)                            |
| <i>IFNG</i>     | IFN- $\gamma$  | 3458                    | Cytokine, Th1 polarization (48)                                   |
| <i>IL-8</i>     | CXCL8          | 3576                    | Chemokine, inflammation/cellular recruitment (49)                 |
| <i>CCL3</i>     | MIP-1 $\alpha$ | 6348                    | Chemokine, inflammation/cellular recruitment (49, 50)             |
| <i>XCL1</i>     | Lymphotactin   | 6375                    | Chemokine, inflammation/cellular recruitment (50)                 |
| <i>TNFSF2</i>   | TNF- $\alpha$  | 7124                    | Proinflammatory cytokine (18, 49)                                 |
| <i>TNFSF6</i>   | FasL           | 356                     | DcR3 counterstructure in HVEM axis (11)                           |
| <i>TNFSF14</i>  | LIGHT          | 8740                    | Proinflammatory HVEM ligand, HVEM axis (11)                       |
| <i>TNFSF9</i>   | 4-1BBL/CD137L  | 8744                    | CD137 ligand (22)                                                 |
| <i>TNFSF15</i>  | TL1A           | 9966                    | HVEM ligand, HVEM axis (11)                                       |

**Table S1. Cont.**

| Gene          | Also known as | Gene identification no. | Function                                            |
|---------------|---------------|-------------------------|-----------------------------------------------------|
| <i>ADAM17</i> | TACE          | 6868                    | TNF- $\alpha$ cleaving enzyme (51)                  |
| <i>RAB27A</i> |               | 5873                    | Granule exocytosis, Griscelli syndrome type II (52) |
| <i>STX11</i>  | FHL4          | 8676                    | Granule exocytosis, FHL (53)                        |
| <i>GZMB</i>   |               | 3002                    | Proapoptotic granule protein (54)                   |

Gene names and synonyms are shown, along with the gene accession number from the National Center for Biotechnology Information (NCBI; [ncbi.nlm.nih.gov/gene](http://ncbi.nlm.nih.gov/gene)). The functions indicated are those relevant to NK cells or the immune system where possible. The list of all significantly altered genes is presented in [Dataset S1](#). All array data have been deposited in the Gene Expression Omnibus ([ncbi.nlm.nih.gov/geo](http://ncbi.nlm.nih.gov/geo)), under accession number GSE55977. DcR3, decoy receptor 3; ER, endoplasmic reticulum; FHL, familial hemophagocytic lymphohistiocytosis; LN, lymph node; PVR, poliovirus receptor; RTK, receptor tyrosine kinase; SLAM, signaling lymphocyte activation molecule; TF, transcription factor.

- Martin MP, Carrington M (2013) Immunogenetics of HIV disease. *Immunol Rev* 254(1):245–264.
- Rajagopalan S, Long EO (2012) Cellular senescence induced by CD158d reprograms natural killer cells to promote vascular remodeling. *Proc Natl Acad Sci USA* 109(50):20596–20601.
- Braud VM, et al. (1998) HLA-E binds to natural killer cell receptors CD94/NKG2A, B and C. *Nature* 391(6669):795–799.
- Bottino C, et al. (2003) Identification of PVR (CD155) and Nectin-2 (CD112) as cell surface ligands for the human DNAM-1 (CD226) activating molecule. *J Exp Med* 198(4):557–567.
- Boles KS, Barchet W, Diacovo T, Cella M, Colonna M (2005) The tumor suppressor TSLC1/NECL-2 triggers NK-cell and CD8+ T-cell responses through the cell-surface receptor CRTAM. *Blood* 106(3):779–786.
- Stanitsky N, et al. (2009) The interaction of TIGIT with PVR and PVRL2 inhibits human NK cell cytotoxicity. *Proc Natl Acad Sci USA* 106(42):17858–17863.
- Tassi I, Colonna M (2005) The cytotoxicity receptor CRACC (CS-1) recruits EAT-2 and activates the PI3K and phospholipase Cgamma signaling pathways in human NK cells. *J Immunol* 175(12):7996–8002.
- Gleason MK, et al. (2012) Tim-3 is an inducible human natural killer cell receptor that enhances interferon gamma production in response to galectin-9. *Blood* 119(13):3064–3072.
- Ndhlovu LC, et al. (2012) Tim-3 marks human natural killer cell maturation and suppresses cell-mediated cytotoxicity. *Blood* 119(16):3734–3743.
- Shiow LR, et al. (2006) CD69 acts downstream of interferon-alpha/beta to inhibit S1P1 and lymphocyte egress from lymphoid organs. *Nature* 440(7083):540–544.
- Steinberg MW, Cheung TC, Ware CF (2011) The signaling networks of the herpesvirus entry mediator (TNFRSF14) in immune regulation. *Immunol Rev* 244(1):169–187.
- Simpson TR, Quezada SA, Allison JP (2010) Regulation of CD4 T cell activation and effector function by inducible costimulator (ICOS). *Curr Opin Immunol* 22(3):326–332.
- Hesslein DG, et al. (2011) Differential requirements for CD45 in NK-cell function reveal distinct roles for Syk-family kinases. *Blood* 117(11):3087–3095.
- Frey M, et al. (1998) Differential expression and function of L-selectin on CD56bright and CD56dim natural killer cell subsets. *J Immunol* 161(1):400–408.
- Vignali DA, Kuchroo VK (2012) IL-12 family cytokines: Immunological playmakers. *Nat Immunol* 13(8):722–728.
- Kotlarz D, et al. (2013) Loss-of-function mutations in the IL-21 receptor gene cause a primary immunodeficiency syndrome. *J Exp Med* 210(3):433–443.
- Kelly-Welch AE, Hanson EM, Boothby MR, Keegan AD (2003) Interleukin-4 and interleukin-13 signaling connections maps. *Science* 300(5625):1527–1528.
- Walczak H (2011) TNF and ubiquitin at the crossroads of gene activation, cell death, inflammation, and cancer. *Immunol Rev* 244(1):9–28.
- Croft M (2010) Control of immunity by the TNFR-related molecule OX40 (CD134). *Annu Rev Immunol* 28:57–78.
- Kohrt HE, et al. (2012) Stimulation of natural killer cells with a CD137-specific antibody enhances trastuzumab efficacy in xenotransplant models of breast cancer. *J Clin Invest* 122(3):1066–1075.
- Baessler T, et al. (2010) CD137 ligand mediates opposite effects in human and mouse NK cells and impairs NK-cell reactivity against human acute myeloid leukemia cells. *Blood* 115(15):3058–3069.
- Lynch DH (2008) The promise of 4-1BB (CD137)-mediated immunomodulation and the immunotherapy of cancer. *Immunol Rev* 222:277–286.
- Vossen MT, et al. (2008) CD27 defines phenotypically and functionally different human NK cell subsets. *J Immunol* 180(6):3739–3745.
- Lee JS, et al. (2009) Recruitment of Sprouty1 to immune synapse regulates T cell receptor signaling. *J Immunol* 183(11):7178–7186.
- Chiu YL, et al. (2014) Sprouty-2 regulates HIV-specific T cell polyfunctionality. *J Clin Invest* 124(1):198–208.
- Rousseau S, et al. (2008) TPL2-mediated activation of ERK1 and ERK2 regulates the processing of pre-TNF alpha in LPS-stimulated macrophages. *J Cell Sci* 121(Pt 2):149–154.
- Dong C, Davis RJ, Flavell RA (2002) MAP kinases in the immune response. *Annu Rev Immunol* 20:55–72.
- Rhee I, Veillette A (2012) Protein tyrosine phosphatases in lymphocyte activation and autoimmunity. *Nat Immunol* 13(5):439–447.
- Bachmaier K, et al. (2000) Negative regulation of lymphocyte activation and autoimmunity by the molecular adaptor Cbl-b. *Nature* 403(6766):211–216.
- Srivastava S, et al. (2009) The class II phosphatidylinositol 3 kinase C2beta is required for the activation of the K+ channel KCa3.1 and CD4 T-cells. *Mol Biol Cell* 20(17):3783–3791.
- Bi L, Okabe I, Bernard DJ, Wynshaw-Boris A, Nussbaum RL (1999) Proliferative defect and embryonic lethality in mice homozygous for a deletion in the p110alpha subunit of phosphoinositide 3-kinase. *J Biol Chem* 274(16):10963–10968.
- Suzuki H, et al. (1999) Xid-like immunodeficiency in mice with disruption of the p85alpha subunit of phosphoinositide 3-kinase. *Science* 283(5400):390–392.
- Hildebrand JM, et al. (2011) Roles of tumor necrosis factor receptor associated factor 3 (TRAF3) and TRAF5 in immune cell functions. *Immunol Rev* 244(1):55–74.
- Shapiro MJ, Nguyen CT, Aghajanian H, Zhang W, Shapiro VS (2008) Negative regulation of TCR signaling by linker for activation of X cells via phosphotyrosine-dependent and -independent mechanisms. *J Immunol* 181(10):7055–7061.
- Sinai P, Nguyen C, Schatzle JD, Wülfing C (2010) Transience in polarization of cytolytic effectors is required for efficient killing and controlled by Cdc42. *Proc Natl Acad Sci USA* 107(26):11912–11917.
- Dong Z, et al. (2009) Essential function for SAP family adaptors in the surveillance of hematopoietic cells by natural killer cells. *Nat Immunol* 10(9):973–980.
- Javadi M, et al. (2012) The SH2B1 adaptor protein associates with a proximal region of the erythropoietin receptor. *J Biol Chem* 287(31):26223–26234.
- Gascoyne DM, et al. (2009) The basic leucine zipper transcription factor E4BP4 is essential for natural killer cell development. *Nat Immunol* 10(10):1118–1124.
- Macian F (2005) NFAT proteins: Key regulators of T-cell development and function. *Nat Rev Immunol* 5(6):472–484.
- Berga-Bolaños R, Alberdi M, Buxadé M, Aramburu J, López-Rodríguez C (2013) NFAT5 induction by the pre-T-cell receptor serves as a selective survival signal in T-lymphocyte development. *Proc Natl Acad Sci USA* 110(40):16091–16096.
- Vallabhapurapu S, Karin M (2009) Regulation and function of NF-kappaB transcription factors in the immune system. *Annu Rev Immunol* 27:693–733.
- Nie Z, et al. (2012) c-Myc is a universal amplifier of expressed genes in lymphocytes and embryonic stem cells. *Cell* 151(1):68–79.
- Gómez-Martin D, Díaz-Zamudio M, Galindo-Campos M, Alcocer-Varela J (2010) Early growth response transcription factors and the modulation of immune response: Implications towards autoimmunity. *Autoimmun Rev* 9(6):454–458.
- Kallies A, et al. (2011) A role for Blimp1 in the transcriptional network controlling natural killer cell maturation. *Blood* 117(6):1869–1879.
- Kamimura D, Bevan MJ (2008) Endoplasmic reticulum stress regulator XBP-1 contributes to effector CD8+ T cell differentiation during acute infection. *J Immunol* 181(8):5433–5441.
- Hamilton JA (2008) Colony-stimulating factors in inflammation and autoimmunity. *Nat Rev Immunol* 8(7):533–544.
- Broughton SE, et al. (2012) The GM-CSF/IL-3/IL-5 cytokine receptor family: From ligand recognition to initiation of signaling. *Immunol Rev* 250(1):277–302.
- Martin-Fontecha A, et al. (2004) Induced recruitment of NK cells to lymph nodes provides IFN-gamma for T(H)1 priming. *Nat Immunol* 5(12):1260–1265.
- Fauriat C, Long EO, Ljunggren HG, Bryceson YT (2010) Regulation of human NK-cell cytokine and chemokine production by target cell recognition. *Blood* 115(11):2167–2176.
- Dorner BG, et al. (2004) Coordinate expression of cytokines and chemokines by NK cells during murine cytomegalovirus infection. *J Immunol* 172(5):3119–3131.
- Scheller J, Chalaris A, Garbers C, Rose-John S (2011) ADAM17: A molecular switch to control inflammation and tissue regeneration. *Trends Immunol* 32(8):380–387.
- Wood SM, et al. (2009) Different NK cell-activating receptors preferentially recruit Rab27a or Munc13-4 to perforin-containing granules for cytotoxicity. *Blood* 114(19):4117–4127.
- Bryceson YT, et al. (2007) Defective cytotoxic lymphocyte degranulation in syntaxin-11 deficient familial hemophagocytic lymphohistiocytosis 4 (FHL4) patients. *Blood* 110(6):1906–1915.
- Ewen CL, Kane KP, Bleackley RC (2012) A quarter century of granzymes. *Cell Death Differ* 19(1):28–35.

## Other Supporting Information Files

[Dataset S1 \(XLSX\)](#)
